# Supplementary material
Source: publisher figshare collection journal article supplement (https://gsapubs.figshare.com/ndownloader/files/39429124)
Supplement: Supplementary file 1 [file 39429124]

## Sheet: SI-2
SI-2: U-Pb zircon data
								Correlation					Age (Ma)	Age (Ma)
Analysis name	remarks	206Pb/	206Pb/	207Pb/	207Pb/	207Pb/	207Pb/	of Concordia	204Pb/	204Pb/	Th/U	U	206Pb/	206Pb/
		238U	238U	235U	235U	206Pb/	206Pb/	Ellipses	206Pb	206Pb	mass	ppm	238U	238U	% Radiogenic
															206Pb
			1 s.e.		1 s.e.		1 s.e.			1 s.e.				1 s.e.
Sample 104 regression age: 110.7±1.8 Ma (2σ; MSWD = 0.99, n = 28)
U-Pb_zircon02082016\ 104@1.ais		0.0182	0.000689	0.148	0.00820	0.0591	0.00249	0.651	0.000542	0.000127	0.784	322	115	4.39	98.6
U-Pb_zircon02082016\ 104@10.ais		0.0172	0.000894	0.146	0.00961	0.0614	0.00178	0.906	0.000952	0.000211	0.708	388	108	5.69	98.3
U-Pb_zircon02082016\ 104@11.ais		0.0179	0.000834	0.206	0.0151	0.0831	0.00408	0.756	0.00210	0.000473	0.636	151	110	5.35	95.5
U-Pb_zircon02082016\ 104@12.ais		0.0174	0.00105	0.182	0.0173	0.0758	0.00569	0.615	0.00131	0.000373	0.467	154	107	6.73	96.5
U-Pb_zircon02082016\ 104@13.ais		0.0180	0.000732	0.161	0.00760	0.0648	0.00188	0.793	0.000868	0.000217	0.789	300	112	4.66	97.9
U-Pb_zircon02082016\ 104@14.ais		0.0187	0.000765	0.234	0.0150	0.0907	0.00536	0.437	0.00180	0.000545	0.508	130	113	4.92	94.6
U-Pb_zircon02082016\ 104@15.ais		0.0187	0.000777	0.164	0.00979	0.0635	0.00245	0.768	0.000979	0.000235	0.834	266	117	4.95	98.1
U-Pb_zircon02082016\ 104@16.ais		0.0172	0.000618	0.169	0.0101	0.0712	0.00325	0.640	0.00108	0.000248	0.619	297	107	3.96	97.0
U-Pb_zircon02082016\ 104@17.ais		0.0195	0.000769	0.173	0.0117	0.0643	0.00287	0.779	0.00126	0.000251	0.769	298	122	4.91	98.0
U-Pb_zircon02082016\ 104@18.ais		0.0180	0.000764	0.199	0.0156	0.0802	0.00471	0.676	0.00126	0.000365	0.614	181	111	4.92	95.9
U-Pb_zircon02082016\ 104@19.ais		0.0184	0.000994	0.210	0.0165	0.0827	0.00425	0.758	0.00201	0.000465	0.674	165	113	6.36	95.6
U-Pb_zircon02082016\ 104@2.ais		0.0166	0.000765	0.134	0.00816	0.0588	0.00223	0.781	0.000410	0.000122	0.704	375	104	4.87	98.6
U-Pb_zircon02082016\ 104@3.ais		0.0167	0.000668	0.137	0.00768	0.0594	0.00232	0.719	0.000914	0.000185	0.624	313	105	4.26	98.6
U-Pb_zircon02082016\ 104@4.ais		0.0169	0.000808	0.166	0.0128	0.0714	0.00397	0.698	0.00184	0.000335	0.534	217	105	5.17	97.0
U-Pb_zircon02082016\ 104@5.ais		0.0174	0.000845	0.139	0.00921	0.0579	0.00220	0.826	0.00102	0.000227	0.745	344	110	5.38	98.8
U-Pb_zircon02082016\ 104@6.ais		0.0172	0.000767	0.136	0.00854	0.0572	0.00204	0.834	0.000391	0.000120	1.01	486	109	4.88	98.8
U-Pb_zircon02082016\ 104@7.ais		0.0171	0.000798	0.148	0.0117	0.0629	0.00342	0.743	0.000670	0.000194	0.768	320	107	5.10	98.1
U-Pb_zircon02082016\ 104@8.ais		0.0167	0.000845	0.168	0.0115	0.0730	0.00327	0.756	0.00227	0.000485	0.621	185	103	5.40	96.8
U-Pb_zircon02082016\ 104@9.ais		0.0176	0.000771	0.198	0.0140	0.0816	0.00424	0.680	0.00168	0.000397	0.652	172	108	4.95	95.7
U-Pb_zircon02082016\ 115@20.ais		0.0172	0.000618	0.174	0.0161	0.0734	0.00557	0.616	0.00134	0.000324	0.483	229	106	4.02	96.8
U-Pb_zircon02082016\ 115@21.ais		0.0185	0.000770	0.200	0.0160	0.0786	0.00399	0.837	0.00168	0.000516	0.683	151	113	4.96	96.1
U-Pb_zircon02082016\ 115@22.ais		0.0190	0.000871	0.267	0.0213	0.102	0.00613	0.667	0.00317	0.000818	0.548	76.9	113	5.64	93.1
U-Pb_zircon02082016\ 115@23.ais		0.0179	0.000623	0.159	0.00732	0.0645	0.00176	0.807	0.000837	0.000185	0.642	499	112	3.97	97.9
U-Pb_zircon02082016\ 115@24.ais		0.0176	0.000699	0.134	0.00557	0.0555	0.00108	0.887	0.000384	0.0000991	1.02	762	111	4.44	99.1
U-Pb_zircon02082016\ 115@25.ais		0.0170	0.000638	0.161	0.00940	0.0686	0.00312	0.628	0.000799	0.000237	0.661	277	106	4.08	97.4
U-Pb_zircon02082016\ 115@27.ais		0.0185	0.000835	0.255	0.0253	0.1000	0.00739	0.720	0.00386	0.000900	0.387	105	110	5.47	93.4
U-Pb_zircon02082016\ 115@28.ais		0.0175	0.000665	0.177	0.0112	0.0734	0.00309	0.766	0.00156	0.000348	0.644	235	108	4.26	96.8
U-Pb_zircon02082016\ 115@29.ais		0.0194	0.000794	0.198	0.0102	0.0740	0.00269	0.710	0.00158	0.000440	0.566	168	120	5.06	96.7
Sample 115 regression age: 100.8±6.8 Ma (2σ; MSWD = 1.16, n = 3)
U-Pb_zircon02082016\ 115@1.ais	excluded	0.0119	0.000687	0.128	0.00902	0.0781	0.00378	0.733	0.00248	0.000630	0.547	215	73.2	4.41	96.1
U-Pb_zircon02082016\ 115@2.ais		0.0185	0.00119	0.279	0.0291	0.110	0.00732	0.784	0.00351	0.000721	0.252	109	109	7.71	92.1
U-Pb_zircon02082016\ 115@3.ais		0.0175	0.000783	0.351	0.0463	0.145	0.0162	0.592	0.00656	0.00120	0.205	215	98.0	5.59	87.5
U-Pb_zircon02082016\ 115@4.ais		0.0168	0.00107	0.281	0.0274	0.122	0.00974	0.575	0.00516	0.00136	0.321	78.5	97.2	6.96	90.6
U-Pb_zircon02082016\ 115@5.ais	excluded	0.264	0.0168	3.99	0.255	0.110	0.00169	0.971	0.000727	0.000106	0.655	80.4	1480	86.9	97.6
Sample 177 regression age: 116.0±1.8 Ma (2σ; MSWD = 0.89, n = 24)
U-Pb_zircon02082016\ 177_1B@1.ais		0.0211	0.00112	0.231	0.0273	0.0794	0.00755	0.620	0.00143	0.000228	0.602	190	129	7.23	96.1
U-Pb_zircon02082016\ 177_1B@10.ais		0.0177	0.000711	0.143	0.00766	0.0586	0.00198	0.774	0.000351	0.000146	0.564	155	112	4.52	98.7
U-Pb_zircon02082016\ 177_1B@11.ais		0.0174	0.000701	0.135	0.00643	0.0562	0.00157	0.812	0.000513	0.000186	0.461	215	110	4.46	99.0
U-Pb_zircon02082016\ 177_1B@12.ais		0.0183	0.000766	0.143	0.00636	0.0567	0.00104	0.912	0.000229	0.0000725	0.125	251	116	4.86	98.9
U-Pb_zircon02082016\ 177_1B@13.ais		0.0180	0.000722	0.133	0.00721	0.0539	0.00178	0.793	0.000333	0.0000922	0.441	213	114	4.59	99.3
U-Pb_zircon02082016\ 177_1B@14.ais		0.0178	0.000730	0.131	0.00584	0.0533	0.00137	0.824	0.000617	0.000128	0.419	217	113	4.64	99.4
U-Pb_zircon02082016\ 177_1B@15.ais		0.0178	0.000741	0.133	0.00699	0.0540	0.00159	0.830	0.000861	0.000168	0.412	189	113	4.71	99.3
U-Pb_zircon02082016\ 177_1B@16.ais		0.0179	0.000740	0.129	0.00579	0.0520	0.000926	0.918	0.000281	0.0000768	0.408	270	114	4.70	99.5
U-Pb_zircon02082016\ 177_1B@17.ais		0.0177	0.000734	0.131	0.00602	0.0535	0.00133	0.842	0.000533	0.000120	0.443	208	113	4.66	99.3
U-Pb_zircon02082016\ 177_1B@18.ais		0.0179	0.000761	0.138	0.00788	0.0560	0.00226	0.708	0.000487	0.000143	0.430	139	113	4.84	99.0
U-Pb_zircon02082016\ 177_1B@19.ais		0.0179	0.000730	0.128	0.00699	0.0519	0.00168	0.806	0.000287	0.000101	0.409	188	114	4.64	99.5
U-Pb_zircon02082016\ 177_1B@2.ais		0.0195	0.000744	0.139	0.00565	0.0517	0.000814	0.922	0.000256	0.0000604	0.579	352	124	4.71	99.6
U-Pb_zircon02082016\ 177_1B@20.ais		0.0178	0.000771	0.130	0.00638	0.0529	0.00133	0.860	0.000266	0.0000702	0.588	316	113	4.90	99.4
U-Pb_zircon02082016\ 177_1B@21.ais		0.0188	0.000767	0.130	0.00549	0.0501	0.000675	0.948	0.000255	0.0000625	0.544	329	120	4.86	99.8
U-Pb_zircon02082016\ 177_1B@22.ais		0.0178	0.000786	0.128	0.00622	0.0520	0.00108	0.904	0.000215	0.0000590	0.520	362	113	4.99	99.5
U-Pb_zircon02082016\ 177_1B@23.ais		0.0182	0.000731	0.126	0.00539	0.0503	0.000715	0.943	0.000163	0.0000384	0.774	577	116	4.64	99.8
U-Pb_zircon02082016\ 177_1B@24.ais		0.0187	0.000730	0.131	0.00569	0.0510	0.00103	0.885	0.000284	0.0000601	0.644	418	119	4.63	99.7
U-Pb_zircon02082016\ 177_1B@25.ais		0.0185	0.000761	0.158	0.0103	0.0619	0.00288	0.702	0.00112	0.000244	0.394	97.4	116	4.85	98.3
U-Pb_zircon02082016\ 177_1B@3.ais		0.0189	0.000701	0.140	0.00551	0.0537	0.000653	0.951	0.000488	0.000105	0.430	228	120	4.45	99.3
U-Pb_zircon02082016\ 177_1B@4.ais		0.0194	0.000710	0.139	0.00590	0.0519	0.000980	0.897	0.000523	0.0000955	0.464	286	123	4.50	99.6
U-Pb_zircon02082016\ 177_1B@5.ais		0.0185	0.000695	0.129	0.00545	0.0506	0.000952	0.895	0.000290	0.0000612	0.427	440	118	4.41	99.7
U-Pb_zircon02082016\ 177_1B@6.ais		0.0179	0.000675	0.129	0.00508	0.0520	0.000775	0.927	0.000361	0.0000726	0.523	418	114	4.28	99.5
U-Pb_zircon02082016\ 177_1B@7.ais		0.0180	0.000715	0.136	0.00588	0.0548	0.000941	0.917	0.00106	0.000171	0.451	225	114	4.54	99.2
U-Pb_zircon02082016\ 177_1B@8.ais		0.0180	0.000725	0.160	0.00853	0.0644	0.00212	0.787	0.000714	0.000198	0.418	112	113	4.62	97.9
U-Pb_zircon02082016\ 177_1B@9.ais		0.0176	0.000671	0.150	0.00765	0.0617	0.00199	0.778	0.00108	0.000239	0.358	114	111	4.27	98.3
Sample 32 model age (zircon age extractor): 110.4 +1.6/-7.2 Ma (2σ)
U-Pb_zircon02082016\ 32=4@1.ais		0.0172	0.000985	0.132	0.00821	0.0555	0.00133	0.923	0.000364	0.000101	0.600	283	109	6.26	99.1
U-Pb_zircon02082016\ 32=4@10.ais		0.0176	0.000672	0.133	0.00618	0.0549	0.00133	0.853	0.000257	0.0000741	0.699	462	111	4.27	99.1
U-Pb_zircon02082016\ 32=4@11.ais	excluded	0.239	0.00965	3.02	0.120	0.0916	0.000606	0.987	0.0000409	0.0000109	0.327	255	1370	50.6	99.5
U-Pb_zircon02082016\ 32=4@12.ais		0.0176	0.000824	0.168	0.0116	0.0690	0.00320	0.745	0.00125	0.000323	0.451	167	110	5.26	97.3
U-Pb_zircon02082016\ 32=4@13.ais		0.0180	0.000772	0.195	0.0140	0.0787	0.00400	0.714	0.00132	0.000257	0.631	220	111	4.95	96.1
U-Pb_zircon02082016\ 32=4@14.ais		0.0175	0.000686	0.132	0.00552	0.0546	0.00113	0.872	0.000422	0.0000936	1.09	519	111	4.36	99.2
U-Pb_zircon02082016\ 32=4@15.ais		0.0175	0.000812	0.203	0.0147	0.0839	0.00380	0.797	0.00226	0.000531	0.663	157	107	5.21	95.4
U-Pb_zircon02082016\ 32=4@16.ais		0.0170	0.000975	0.217	0.0223	0.0926	0.00655	0.750	0.00337	0.000786	0.289	67.6	103	6.31	94.3
U-Pb_zircon02082016\ 32=4@17.ais		0.0182	0.000950	0.131	0.00676	0.0521	0.000928	0.941	0.000231	0.0000535	0.785	951	116	6.03	99.5
U-Pb_zircon02082016\ 32=4@18.ais	excluded	0.0226	0.000981	0.406	0.0347	0.131	0.00832	0.690	0.00305	0.000540	0.292	113	129	6.49	89.5
U-Pb_zircon02082016\ 32=4@19.ais	excluded	0.0142	0.000789	0.113	0.00736	0.0574	0.00186	0.868	0.000605	0.000138	0.209	635	90.1	5.03	98.8
U-Pb_zircon02082016\ 32=4@2.ais		0.0175	0.000976	0.144	0.0103	0.0595	0.00247	0.818	0.00113	0.000211	0.468	180	110	6.21	98.5
U-Pb_zircon02082016\ 32=4@20.ais		0.0150	0.000616	0.112	0.00543	0.0539	0.00123	0.885	0.000561	0.0000962	0.239	803	95.5	3.92	99.2
U-Pb_zircon02082016\ 32=4@21.ais		0.0156	0.000766	0.134	0.00796	0.0624	0.00180	0.875	0.00108	0.000167	0.777	530	98.1	4.88	98.2
U-Pb_zircon02082016\ 32=4@22.ais		0.0176	0.000853	0.128	0.00671	0.0526	0.000921	0.943	0.000405	0.0000740	0.245	826	112	5.42	99.4
U-Pb_zircon02082016\ 32=4@23.ais	excluded	0.277	0.0128	4.16	0.200	0.109	0.000537	0.995	0.000556	0.0000759	0.248	298	1550	65.5	98.2
U-Pb_zircon02082016\ 32=4@24.ais		0.0155	0.000815	0.156	0.0116	0.0731	0.00324	0.810	0.000636	0.000170	0.533	341	96.1	5.22	96.8
U-Pb_zircon02082016\ 32=4@25.ais		0.0179	0.000744	0.166	0.00883	0.0672	0.00216	0.798	0.00235	0.000371	0.194	302	112	4.74	97.6
U-Pb_zircon02082016\ 32=4@26.ais		0.0167	0.000796	0.177	0.0113	0.0766	0.00351	0.698	0.00164	0.000302	0.213	231	103	5.09	96.3
U-Pb_zircon02082016\ 32=4@27.ais		0.0156	0.000743	0.170	0.0152	0.0791	0.00530	0.675	0.00178	0.000407	0.255	225	95.9	4.79	96.0
U-Pb_zircon02082016\ 32=4@28.ais		0.0184	0.000868	0.163	0.0129	0.0641	0.00332	0.776	0.00126	0.000248	0.501	246	116	5.54	98.0
U-Pb_zircon02082016\ 32=4@29.ais		0.0186	0.000837	0.186	0.0106	0.0726	0.00171	0.918	0.00122	0.000234	0.442	269	115	5.33	96.9
U-Pb_zircon02082016\ 32=4@3.ais	excluded	0.0198	0.00166	0.145	0.0114	0.0531	0.000721	0.988	0.000467	0.0000797	0.656	460	126	10.5	99.4
U-Pb_zircon02082016\ 32=4@4.ais		0.0181	0.000828	0.148	0.00919	0.0593	0.00223	0.799	0.000711	0.000155	0.571	173	114	5.27	98.6
U-Pb_zircon02082016\ 32=4@5.ais	excluded	0.0193	0.00237	0.167	0.0198	0.0624	0.00179	0.972	0.00142	0.000248	0.437	205	121	15.0	98.2
U-Pb_zircon02082016\ 32=4@7.ais		0.0157	0.000669	0.109	0.00507	0.0507	0.00117	0.868	0.000328	0.000104	0.658	370	99.9	4.26	99.7
U-Pb_zircon02082016\ 32=4@8.ais	excluded	0.0209	0.000968	0.252	0.0183	0.0876	0.00439	0.727	0.00255	0.000494	0.278	96.9	127	6.20	95.0
U-Pb_zircon02082016\ 32=4@9.ais		0.0164	0.000754	0.135	0.00668	0.0597	0.00147	0.870	0.000513	0.000131	0.491	407	103	4.80	98.5
Sample 41 regression age: 112.2±2.2 Ma (2σ; MSWD = 1.21, n = 26)
U-Pb_zircon02082016\ 41@1.ais		0.0220	0.00104	0.400	0.0464	0.132	0.0112	0.777	0.00343	0.00102	0.358	63.7	125	7.05	89.3
U-Pb_zircon02082016\ 41@10.ais		0.0191	0.000953	0.277	0.0283	0.105	0.00661	0.880	0.00280	0.001000	0.423	112	113	6.23	92.7
U-Pb_zircon02082016\ 41@11.ais		0.0179	0.000796	0.234	0.0167	0.0947	0.00542	0.598	0.00206	0.000563	0.244	124	108	5.13	94.0
U-Pb_zircon02082016\ 41@12.ais		0.0188	0.000783	0.296	0.0320	0.114	0.00960	0.706	0.00441	0.00105	0.389	82.3	110	5.27	91.6
U-Pb_zircon02082016\ 41@13.ais		0.0210	0.00141	0.437	0.0549	0.151	0.0108	0.898	0.00547	0.00137	0.356	47.1	117	9.42	86.9
U-Pb_zircon02082016\ 41@14.ais		0.0203	0.000839	0.375	0.0451	0.134	0.0133	0.645	0.00487	0.00121	0.367	57.9	116	5.86	89.0
U-Pb_zircon02082016\ 41@15.ais		0.0206	0.00110	0.442	0.0366	0.156	0.00825	0.780	0.00954	0.00266	0.355	48.3	113	7.25	86.2
U-Pb_zircon02082016\ 41@16.ais		0.0215	0.000804	0.354	0.0369	0.120	0.0103	0.621	0.00435	0.00109	0.356	57.9	125	5.47	90.9
U-Pb_zircon02082016\ 41@17.ais		0.0214	0.00116	0.582	0.0538	0.197	0.0152	0.552	0.00804	0.00188	0.240	37.1	111	7.93	80.9
U-Pb_zircon02082016\ 41@18.ais		0.0193	0.00119	0.344	0.0399	0.129	0.0100	0.783	0.00447	0.00120	0.354	70.2	111	7.85	89.6
U-Pb_zircon02082016\ 41@2.ais		0.0220	0.00171	0.515	0.0743	0.170	0.0155	0.825	0.00807	0.00164	0.327	45.6	119	11.6	84.5
U-Pb_zircon02082016\ 41@20.ais		0.0199	0.00103	0.405	0.0495	0.147	0.0144	0.632	0.00758	0.00152	0.350	74.8	111	7.07	87.3
U-Pb_zircon02082016\ 41@21.ais		0.0185	0.000604	0.266	0.0229	0.104	0.00813	0.426	0.00268	0.000649	2.16	144	110	4.03	92.9
U-Pb_zircon02082016\ 41@22.ais		0.0188	0.000606	0.345	0.0279	0.133	0.00972	0.428	0.00555	0.00124	0.442	76.6	107	4.14	89.1
U-Pb_zircon02082016\ 41@23.ais		0.0184	0.000714	0.248	0.0225	0.0978	0.00750	0.548	0.00381	0.000791	1.33	133	110	4.69	93.6
U-Pb_zircon02082016\ 41@24.ais		0.0218	0.00183	0.694	0.0823	0.231	0.0111	0.945	0.0115	0.00267	0.328	30.7	107	12.5	76.6
U-Pb_zircon02082016\ 41@26.ais		0.0196	0.00113	0.462	0.0642	0.171	0.0173	0.779	0.00450	0.00142	0.244	46.2	105	7.99	84.2
U-Pb_zircon02082016\ 41@27.ais		0.0202	0.000757	0.454	0.0637	0.163	0.0191	0.691	0.00998	0.00230	0.388	43.2	110	5.95	85.3
U-Pb_zircon02082016\ 41@28.ais		0.0204	0.000894	0.361	0.0472	0.129	0.0148	0.506	0.00391	0.00107	0.408	74.8	117	6.23	89.7
U-Pb_zircon02082016\ 41@3.ais		0.0187	0.00114	0.322	0.0365	0.125	0.00870	0.847	0.00419	0.00102	0.364	71.9	108	7.50	90.2
U-Pb_zircon02082016\ 41@4.ais		0.0193	0.000779	0.312	0.0273	0.117	0.00776	0.694	0.00476	0.00108	0.360	76.0	113	5.16	91.2
U-Pb_zircon02082016\ 41@5.ais		0.0177	0.000682	0.237	0.0187	0.0973	0.00598	0.645	0.00348	0.000862	0.409	92.5	106	4.45	93.7
U-Pb_zircon02082016\ 41@6.ais		0.0195	0.00104	0.253	0.0219	0.0939	0.00430	0.895	0.00400	0.000896	0.393	91.4	117	6.69	94.2
U-Pb_zircon02082016\ 41@7.ais		0.0174	0.000810	0.214	0.0228	0.0893	0.00789	0.577	0.00350	0.000759	0.337	130	105	5.29	94.7
U-Pb_zircon02082016\ 41@8.ais		0.0176	0.000734	0.212	0.0170	0.0875	0.00479	0.770	0.00373	0.000755	0.472	135	107	4.75	95.0
U-Pb_zircon02082016\ 41@9.ais		0.0186	0.000952	0.305	0.0300	0.119	0.00821	0.747	0.00408	0.00101	0.368	73.5	108	6.26	91.0
Sample 47 regression age: 114.8±2.2 Ma (2σ; MSWD = 0.48, n = 25)
U-Pb_zircon02082016\ 47=1@1.ais		0.0192	0.000786	0.138	0.00672	0.0524	0.00138	0.839	0.000271	0.0000715	0.357	254	122	4.99	99.5
U-Pb_zircon02082016\ 47=1@10.ais		0.0182	0.000761	0.127	0.00566	0.0507	0.000722	0.947	0.000327	0.0000614	0.558	447	116	4.83	99.7
U-Pb_zircon02082016\ 47=1@2.ais		0.0188	0.000754	0.156	0.0113	0.0603	0.00325	0.678	0.000719	0.000204	0.321	106	118	4.81	98.5
U-Pb_zircon02082016\ 47=1@21.ais		0.0189	0.000920	0.129	0.00634	0.0494	0.000490	0.980	0.000117	0.0000302	0.439	699	120	5.83	99.9
U-Pb_zircon02082016\ 47=1@22.ais		0.0184	0.000953	0.138	0.00776	0.0546	0.00143	0.886	0.000364	0.0000759	0.515	376	117	6.05	99.2
U-Pb_zircon02082016\ 47=1@23.ais		0.0185	0.000860	0.135	0.00665	0.0531	0.000745	0.959	0.000373	0.0000766	0.360	327	117	5.46	99.4
U-Pb_zircon02082016\ 47=1@24.ais		0.0182	0.000894	0.138	0.00813	0.0550	0.00187	0.818	0.000561	0.000148	0.333	195	115	5.68	99.1
U-Pb_zircon02082016\ 47=1@25.ais		0.0180	0.000926	0.128	0.00687	0.0514	0.000805	0.957	0.000206	0.0000578	0.387	367	115	5.88	99.6
U-Pb_zircon02082016\ 47=1@26.ais		0.0180	0.000904	0.148	0.00847	0.0598	0.00169	0.870	0.000643	0.000149	0.352	169	113	5.75	98.5
U-Pb_zircon02082016\ 47=1@27.ais		0.0184	0.000974	0.124	0.00676	0.0489	0.000505	0.982	0.0000505	0.0000190	0.444	901	117	6.18	99.9
U-Pb_zircon02082016\ 47=1@28.ais		0.0179	0.000835	0.125	0.00589	0.0508	0.000669	0.961	0.000225	0.0000575	0.400	385	114	5.30	99.7
U-Pb_zircon02082016\ 47=1@29.ais		0.0179	0.000892	0.124	0.00651	0.0503	0.000712	0.963	0.000303	0.0000741	0.299	334	114	5.66	99.7
U-Pb_zircon02082016\ 47=1@3.ais		0.0205	0.00375	0.156	0.0322	0.0550	0.00201	0.990	0.000624	0.000156	0.422	233	130	23.8	99.2
U-Pb_zircon02082016\ 47=1@30.ais		0.0179	0.000845	0.126	0.00638	0.0513	0.00128	0.873	0.000632	0.000139	0.366	185	114	5.36	99.6
U-Pb_zircon02082016\ 47=1@31.ais		0.0179	0.000929	0.133	0.00705	0.0539	0.000696	0.970	0.000257	0.0000570	0.410	524	114	5.90	99.3
U-Pb_zircon02082016\ 47=1@32.ais		0.0173	0.000862	0.118	0.00630	0.0494	0.000839	0.948	0.000162	0.0000445	0.392	514	111	5.47	99.9
U-Pb_zircon02082016\ 47=1@33.ais		0.0190	0.00101	0.130	0.00721	0.0497	0.000460	0.986	0.000120	0.0000278	0.462	863	121	6.40	99.8
U-Pb_zircon02082016\ 47=1@34.ais		0.0181	0.000859	0.135	0.00747	0.0540	0.00151	0.864	0.000555	0.000117	0.348	228	115	5.46	99.3
U-Pb_zircon02082016\ 47=1@35.ais		0.0179	0.000824	0.126	0.00597	0.0510	0.000638	0.965	0.000210	0.0000505	0.375	456	114	5.23	99.7
U-Pb_zircon02082016\ 47=1@4.ais		0.0173	0.000760	0.120	0.00543	0.0501	0.000611	0.963	0.000251	0.0000535	0.430	523	111	4.83	99.8
U-Pb_zircon02082016\ 47=1@5.ais		0.0176	0.000746	0.119	0.00546	0.0493	0.000844	0.927	0.000196	0.0000467	0.514	516	112	4.74	99.9
U-Pb_zircon02082016\ 47=1@6.ais		0.0170	0.000777	0.121	0.00570	0.0516	0.000619	0.967	0.000243	0.0000589	0.527	443	108	4.94	99.6
U-Pb_zircon02082016\ 47=1@7.ais		0.0181	0.000777	0.128	0.00580	0.0513	0.000797	0.939	0.000295	0.0000744	0.425	275	115	4.93	99.6
U-Pb_zircon02082016\ 47=1@8.ais		0.0170	0.000767	0.131	0.00669	0.0557	0.00156	0.839	0.000537	0.000119	0.338	218	108	4.88	99.0
U-Pb_zircon02082016\ 47=1@9.ais		0.0175	0.000759	0.128	0.00581	0.0531	0.000798	0.944	0.000400	0.0000790	0.430	335	111	4.82	99.4
individual ratio and uncertainties 1σ excluding decay constant uncertainites; average age uncertainties 2σ
ratios uncorrected for common Pb
all ages relative to AS3 and FC1 (1099 Ma), external reproducibility of 206Pb/238U age = 3.9 % rel. (n = 40)
U concentrations estimated relative to average of AS3 and FC1 with U = 370 ppm

## Sheet: Info
This Supplemental Material accompanies
Geological Society of America Special Paper 560
Geology of a Large Intact Extensional Oceanic Arc Crustal Section with
Superior Exposures: Cretaceous Alisitos Arc, Baja California (Mexico)
By Cathy J. Busby, Rebecca A. Morris, Susan M. DeBari, Sarah Medynski,
Keith Purtirka, Graham D.M. Andrews, Axel K. Schmitt, and Sarah R. Brown
